# Supplementary material for: Multilevel determinants of community health workers for an effective maternal and child health programme in sub-Saharan Africa: a systematic review
Source: PubMed Central journal article supplement — BMJ Glob Health. 2022 Apr 7;7(4):e008162. doi: 10.1136/bmjgh-2021-008162 (PMC8991040; doi:10.1136/bmjgh-2021-008162), 2022-04-07
Supplement: bmjgh-2021-008162supp002.pdf [file bmjgh-2021-008162supp002.pdf]

**Supplementary File 2.** Search strategySearch Terms: Medline (OVID)**Set 1: Setting**A) Keyword

Sub-Saharan Africa and all names of each country : Sub-Saharan Africa or Angola or Benin or Botswana or Burkina Faso or Burundi or Cameroon or Cape Verde or Central African Republic or Chad or Congo or Ivory Coast or Djibouti or Eritrea or Ethiopia or Gabon or Gambia or Ghana or Guinea or Kenya or Lesotho or Liberia or Madagascar or Malawi or Mali or Mauritania or Mauritius or Mozambique or Namibia or Niger or Nigeria or Reunion or Rwanda or Senegal or Seychelles or Sierra Leone or Somalia or South Africa or Sudan or Swaziland or Tanzania or Togo or Uganda or Zambia or Zimbabwe

B) Keyword

Sub-Saharan Africa regions: Eastern, Central, Western and Southern Africa

**Set 2: Population**A) MeSH

exp health auxiliary/ or Community health worker\*or CHWs/ or Lay health worker\*

**Set 3: Intervention**A) MeSH

Maternal and child adj2 health adj2 (service\* or program\*) or community health\*

B) Keyword

Maternal health / or Under-five child health / exp contraceptive/ or exp antenatal care/ or exp delivery/ or exp postnatal care/ or exp breastfeeding/ or nutrition/ or exp immunization/ or exp vaccination / or exp newborn services

**Set 4: Outcomes**

CHWs' perceived barriers to or facilitators or multilevel determinants of CHWs engagement to ensure MCH equity and a resilient community health system

**Set 5: Study Design**

Qualitative Research/ or Interview/Focus group discussion/or Mixed research or multi-level research

**Search Summary:** Set 1 (A or B) and Set 2 and Set 3 (A or B) and Set 3 and Set 4
